# Supplementary material for: Mediterranean Diet and Associations with the Gut Microbiota and Pediatric-Onset Multiple Sclerosis: a Trivariate Analysis
Source: Research Square preprint supplement (doi:10.21203/rs.3.rs-2540052/v1), 2023-02-20
Supplement: Supplementary file 1 [file d1136ea3491bec7b091f8bd0.xlsx]

## Sheet: Sheet1
The Diet-microbiota subcohort: The association of microbial taxa relative abundance with MS risk and dietary measures (aMed and aMed-Red scores and fiber, whole-grains and iron intake)
Genera	Dietary measures
	MS vs. controls (log odds ratio)	aMED score	aMED-Red score	Fruit (g/d)	Vegetables (g/d)	Legumes (g/d)	Grains (g/d)	Fish (g/d)	MUFA:SFA	Processed and red meat (g/d)	Unprocessed red meat (g/d)	Whole-grains (oz. equiv./d)	Fiber (g/d)	Iron (mg/d)
TM7 phylum sp. oral clone FR058	0.82 (0.045-1.6), P=0.038, Q=0.95	β=-0.024 (-0.31-0.26), P=0.87, Q=0.95	β=-0.049 (-0.34-0.24), P=0.74, Q=0.86	β=-0.078 (-0.38-0.22), P=0.61, Q=0.71	β=-0.034 (-0.32-0.25), P=0.82, Q=0.82	β=-0.079 (-0.37-0.21), P=0.60, Q=0.60	β=0.063 (-0.21-0.34), P=0.65, Q=0.73	β=-0.045 (-0.31-0.22), P=0.74, Q=0.87	β=-0.17 (-0.44-0.11), P=0.23, Q=0.32	β=0.11 (-0.25-0.48), P=0.55, Q=0.75	β=0.02 (-0.26-0.30), P=0.89, Q=0.89	β=0.13 (-0.16-0.42), P=0.39, Q=0.55	β=-0.13 (-0.50-0.24), P=0.48, Q=0.48	β=-0.049 (-0.49-0.39), P=0.83, Q=0.83
Eggerthella	0.73 (0.062-1.4), P=0.032, Q=0.95	β=-0.33 (-0.62--0.041), P=0.025, Q=0.058	β=-0.23 (-0.52-0.055), P=0.11, Q=0.38	β=-0.41 (-0.71--0.11), P=0.0077, Q=0.018	β=-0.42 (-0.70--0.13), P=0.0044, Q=0.01	β=-0.10 (-0.40-0.19), P=0.50, Q=0.58	β=0.25 (-0.022-0.52), P=0.072, Q=0.15	β=0.34 (0.077-0.61), P=0.011, Q=0.038	β=-0.52 (-0.79--0.25), P=0.00019, Q=0.00044	β=0.23 (-0.14-0.59), P=0.22, Q=0.51	β=0.14 (-0.14-0.41), P=0.34, Q=0.66	β=0.24 (-0.052-0.53), P=0.11, Q=0.23	β=-0.59 (-0.96--0.21), P=0.002, Q=0.0035	β=0.059 (-0.38-0.50), P=0.79, Q=0.83
Clostridiales vadinBB60 group	-0.95 (-1.7--0.20), P=0.013, Q=0.95	β=0.35 (0.059-0.64), P=0.018, Q=0.058	β=0.36 (0.067-0.64), P=0.016, Q=0.11	β=0.68 (0.37-0.98), P=1.2e-05, Q=4.2e-05	β=0.51 (0.23-0.80), P=0.00044, Q=0.0031	β=0.46 (0.17-0.76), P=0.002, Q=0.014	β=-0.22 (-0.49-0.053), P=0.11, Q=0.15	β=0.10 (-0.17-0.37), P=0.46, Q=0.87	β=0.21 (-0.058-0.49), P=0.12, Q=0.21	β=-0.078 (-0.44-0.29), P=0.68, Q=0.75	β=0.19 (-0.09-0.47), P=0.18, Q=0.66	β=0.045 (-0.24-0.33), P=0.76, Q=0.88	β=0.80 (0.43-1.2), P=2.4e-05, Q=0.00017	β=0.31 (-0.13-0.75), P=0.17, Q=0.60
Lactococcus	0.73 (0.041-1.4), P=0.038, Q=0.95	β=-0.074 (-0.36-0.21), P=0.61, Q=0.85	β=0.083 (-0.21-0.37), P=0.57, Q=0.84	β=-0.39 (-0.69--0.09), P=0.011, Q=0.019	β=-0.43 (-0.72--0.14), P=0.0031, Q=0.01	β=-0.43 (-0.72--0.14), P=0.0041, Q=0.014	β=0.25 (-0.023-0.52), P=0.072, Q=0.15	β=0.36 (0.09-0.62), P=0.0087, Q=0.038	β=-0.071 (-0.34-0.20), P=0.61, Q=0.61	β=0.43 (0.06-0.79), P=0.022, Q=0.15	β=0.13 (-0.15-0.41), P=0.35, Q=0.66	β=0.22 (-0.068-0.51), P=0.13, Q=0.23	β=-0.45 (-0.82--0.076), P=0.018, Q=0.025	β=-0.12 (-0.56-0.32), P=0.60, Q=0.83
Methanobrevibacter	1.8 (0.15-3.3), P=0.032, Q=0.95	β=-0.41 (-0.70--0.13), P=0.0049, Q=0.034	β=-0.078 (-0.37-0.21), P=0.60, Q=0.84	β=-0.71 (-1.00--0.40), P=4.6e-06, Q=3.2e-05	β=-0.15 (-0.43-0.14), P=0.32, Q=0.37	β=-0.11 (-0.40-0.19), P=0.47, Q=0.58	β=-0.23 (-0.50-0.043), P=0.099, Q=0.15	β=-0.031 (-0.30-0.24), P=0.82, Q=0.87	β=0.90 (0.62-1.2), P=1.1e-10, Q=3.8e-10	β=0.20 (-0.17-0.56), P=0.29, Q=0.51	β=-0.11 (-0.39-0.17), P=0.43, Q=0.66	β=-0.53 (-0.82--0.24), P=0.00034, Q=0.0012	β=-0.72 (-1.10--0.35), P=0.00014, Q=0.00049	β=-0.079 (-0.52-0.36), P=0.72, Q=0.83
Ruminococcaceae NK4A214 group	-1.1 (-1.9--0.38), P=0.0034, Q=0.95	β=0.11 (-0.18-0.40), P=0.45, Q=0.79	β=0.082 (-0.21-0.37), P=0.58, Q=0.84	β=-0.10 (-0.40-0.20), P=0.51, Q=0.71	β=0.23 (-0.056-0.52), P=0.12, Q=0.21	β=0.17 (-0.13-0.46), P=0.26, Q=0.58	β=0.66 (0.39-0.94), P=1.9e-06, Q=1.3e-05	β=-0.023 (-0.29-0.24), P=0.87, Q=0.87	β=1.0 (0.72-1.3), P=7.9e-13, Q=5.5e-12	β=-0.30 (-0.67-0.064), P=0.11, Q=0.38	β=-0.10 (-0.38-0.18), P=0.47, Q=0.66	β=0.84 (0.55-1.1), P=1.3e-08, Q=9.1e-08	β=0.61 (0.24-0.98), P=0.0013, Q=0.003	β=1.5 (1.0-1.9), P=5.8e-11, Q=4.1e-10
Variovorax	1.0 (0.069-1.9), P=0.035, Q=0.95	β=-0.009 (-0.30-0.28), P=0.95, Q=0.95	β=0.0022 (-0.29-0.29), P=0.99, Q=0.99	β=0.018 (-0.28-0.32), P=0.91, Q=0.91	β=-0.19 (-0.48-0.095), P=0.19, Q=0.27	β=-0.15 (-0.44-0.15), P=0.33, Q=0.58	β=0.048 (-0.23-0.32), P=0.73, Q=0.73	β=-0.066 (-0.33-0.20), P=0.63, Q=0.87	β=-0.14 (-0.41-0.14), P=0.33, Q=0.39	β=0.061 (-0.31-0.43), P=0.75, Q=0.75	β=0.043 (-0.24-0.32), P=0.76, Q=0.89	β=0.022 (-0.27-0.31), P=0.88, Q=0.88	β=-0.16 (-0.53-0.22), P=0.41, Q=0.48	β=0.067 (-0.37-0.51), P=0.76, Q=0.83
ASVs	MS vs. controls (log odds ratio)	Dietary measures
		aMED score	aMED-Red score	Fruit (g/d)	Vegetables (g/d)	Legumes (g/d)	Grains (g/d)	Fish (g/d)	MUFA:SFA	Processed and red meat (g/d)	Unprocessed red meat (g/d)	Whole-grains (oz. equiv./d)	Fiber (g/d)	Iron (mg/d)
Anaerofilum sp.	0.76 (0.011-1.5), P=0.047, Q=0.92	β=-0.16 (-0.44-0.13), P=0.27, Q=0.50	β=-0.14 (-0.42-0.15), P=0.34, Q=0.51	β=-0.25 (-0.55-0.05), P=0.10, Q=0.20	β=-0.11 (-0.39-0.18), P=0.46, Q=0.61	β=-0.20 (-0.48-0.079), P=0.16, Q=0.48	β=-0.067 (-0.34-0.20), P=0.63, Q=0.92	β=0.010 (-0.26-0.28), P=0.94, Q=0.98	β=0.28 (0.0099-0.55), P=0.042, Q=0.10	β=0.15 (-0.21-0.51), P=0.41, Q=0.70	β=-0.14 (-0.42-0.13), P=0.31, Q=0.80	β=-0.11 (-0.39-0.18), P=0.46, Q=0.50	β=-0.25 (-0.61-0.10), P=0.16, Q=0.32	β=-0.05 (-0.48-0.38), P=0.82, Q=0.89
Lactococcus sp.	0.78 (0.076-1.5), P=0.03, Q=0.92	β=-0.34 (-0.63--0.058), P=0.018, Q=0.062	β=-0.14 (-0.42-0.14), P=0.33, Q=0.51	β=-0.61 (-0.90--0.31), P=6.7e-05, Q=4e-04	β=-0.59 (-0.88--0.31), P=4.2e-05, Q=5e-04	β=-0.55 (-0.83--0.27), P=0.00012, Q=0.00072	β=-0.027 (-0.30-0.24), P=0.84, Q=0.92	β=0.44 (0.17-0.70), P=0.0012, Q=0.0048	β=-0.19 (-0.46-0.086), P=0.18, Q=0.36	β=0.57 (0.21-0.93), P=0.002, Q=0.024	β=0.12 (-0.16-0.40), P=0.39, Q=0.80	β=-0.14 (-0.43-0.15), P=0.33, Q=0.50	β=-0.74 (-1.10--0.38), P=5.5e-05, Q=0.00022	β=-0.72 (-1.20--0.29), P=0.001, Q=0.006
Lachnoclostridium sp.	1.3 (0.22-2.3), P=0.018, Q=0.92	β=-0.043 (-0.33-0.24), P=0.77, Q=0.88	β=-0.061 (-0.34-0.22), P=0.67, Q=0.73	β=-0.071 (-0.37-0.23), P=0.64, Q=0.75	β=-0.14 (-0.43-0.14), P=0.32, Q=0.55	β=-0.049 (-0.33-0.23), P=0.73, Q=0.81	β=-0.059 (-0.33-0.21), P=0.67, Q=0.92	β=-0.13 (-0.39-0.14), P=0.35, Q=0.70	β=-0.072 (-0.34-0.20), P=0.61, Q=0.71	β=-0.023 (-0.39-0.34), P=0.90, Q=0.90	β=0.028 (-0.25-0.31), P=0.84, Q=0.94	β=-0.12 (-0.40-0.17), P=0.42, Q=0.50	β=-0.19 (-0.55-0.17), P=0.30, Q=0.51	β=-0.26 (-0.69-0.18), P=0.24, Q=0.72
Ruminococcaceae sp.	1.2 (0.27-2.2), P=0.012, Q=0.92	β=0.0047 (-0.28-0.29), P=0.97, Q=0.97	β=0.059 (-0.22-0.34), P=0.69, Q=0.73	β=0.019 (-0.28-0.32), P=0.90, Q=0.90	β=0.048 (-0.24-0.33), P=0.74, Q=0.81	β=-0.048 (-0.33-0.23), P=0.74, Q=0.81	β=-0.14 (-0.41-0.13), P=0.31, Q=0.90	β=0.06 (-0.21-0.33), P=0.66, Q=0.79	β=-0.037 (-0.31-0.24), P=0.79, Q=0.79	β=0.12 (-0.24-0.49), P=0.50, Q=0.75	β=0.16 (-0.12-0.44), P=0.25, Q=0.80	β=-0.16 (-0.45-0.12), P=0.26, Q=0.50	β=-0.098 (-0.46-0.26), P=0.59, Q=0.67	β=-0.098 (-0.53-0.33), P=0.66, Q=0.79
Ruminiclostridium sp.	0.89 (0.028-1.8), P=0.043, Q=0.92	β=-0.15 (-0.44-0.13), P=0.29, Q=0.50	β=-0.05 (-0.33-0.23), P=0.73, Q=0.73	β=-0.32 (-0.62--0.02), P=0.036, Q=0.086	β=-0.12 (-0.41-0.16), P=0.40, Q=0.60	β=0.11 (-0.17-0.40), P=0.42, Q=0.81	β=0.10 (-0.17-0.37), P=0.45, Q=0.90	β=0.23 (-0.039-0.49), P=0.094, Q=0.28	β=-0.10 (-0.37-0.17), P=0.46, Q=0.61	β=0.20 (-0.17-0.56), P=0.29, Q=0.58	β=0.23 (-0.048-0.51), P=0.10, Q=0.60	β=0.17 (-0.12-0.45), P=0.25, Q=0.50	β=-0.094 (-0.45-0.27), P=0.61, Q=0.67	β=0.18 (-0.26-0.61), P=0.42, Q=0.77
Caulobacter sp.	0.87 (0.0048-1.7), P=0.049, Q=0.92	β=-0.036 (-0.32-0.25), P=0.81, Q=0.88	β=-0.064 (-0.35-0.22), P=0.66, Q=0.73	β=-0.06 (-0.36-0.24), P=0.69, Q=0.75	β=-0.057 (-0.34-0.23), P=0.69, Q=0.81	β=-0.056 (-0.34-0.23), P=0.70, Q=0.81	β=-0.12 (-0.39-0.16), P=0.40, Q=0.90	β=-0.076 (-0.34-0.19), P=0.58, Q=0.79	β=-0.16 (-0.43-0.11), P=0.25, Q=0.43	β=0.054 (-0.31-0.42), P=0.77, Q=0.90	β=-0.021 (-0.30-0.26), P=0.88, Q=0.94	β=-0.11 (-0.40-0.17), P=0.44, Q=0.50	β=-0.15 (-0.51-0.21), P=0.40, Q=0.53	β=-0.15 (-0.58-0.29), P=0.51, Q=0.77
Ruminococcaceae NK4A214 group sp.	-1.2 (-1.9--0.40), P=0.0029, Q=0.92	β=0.33 (0.043-0.61), P=0.024, Q=0.062	β=0.25 (-0.035-0.53), P=0.085, Q=0.26	β=0.32 (0.026-0.62), P=0.033, Q=0.086	β=0.37 (0.087-0.65), P=0.011, Q=0.033	β=0.60 (0.32-0.88), P=3.1e-05, Q=0.00037	β=0.53 (0.26-0.80), P=0.00013, Q=0.0016	β=-0.46 (-0.73--0.19), P=0.00069, Q=0.0041	β=1.1 (0.81-1.4), P=6e-15, Q=7.2e-14	β=-0.48 (-0.84--0.12), P=0.0097, Q=0.048	β=-0.023 (-0.30-0.26), P=0.87, Q=0.94	β=0.77 (0.49-1.1), P=1.2e-07, Q=1.4e-06	β=1.0 (0.65-1.4), P=3.7e-08, Q=4.4e-07	β=1.6 (1.2-2.0), P=2.9e-13, Q=3.5e-12
Alistipes indistinctus YIT 12060	-1.3 (-2.6--0.072), P=0.038, Q=0.92	β=0.11 (-0.17-0.39), P=0.45, Q=0.60	β=0.23 (-0.052-0.51), P=0.11, Q=0.26	β=0.20 (-0.10-0.49), P=0.20, Q=0.34	β=-0.0095 (-0.29-0.27), P=0.95, Q=0.95	β=0.39 (0.11-0.67), P=0.0062, Q=0.025	β=0.17 (-0.096-0.44), P=0.21, Q=0.90	β=-0.06 (-0.33-0.21), P=0.66, Q=0.79	β=0.062 (-0.21-0.33), P=0.65, Q=0.71	β=0.37 (0.01-0.73), P=0.044, Q=0.13	β=0.097 (-0.18-0.38), P=0.49, Q=0.80	β=0.26 (-0.026-0.55), P=0.075, Q=0.45	β=0.41 (0.048-0.77), P=0.026, Q=0.062	β=0.14 (-0.29-0.58), P=0.52, Q=0.77
Eggerthella sp.	0.85 (0.13-1.6), P=0.022, Q=0.92	β=-0.52 (-0.80--0.23), P=0.00037, Q=0.0044	β=-0.39 (-0.68--0.11), P=0.0064, Q=0.038	β=-0.68 (-0.98--0.38), P=7.6e-06, Q=9.1e-05	β=-0.54 (-0.82--0.25), P=0.00022, Q=0.0013	β=-0.18 (-0.46-0.10), P=0.21, Q=0.50	β=0.16 (-0.11-0.43), P=0.24, Q=0.90	β=0.49 (0.23-0.76), P=0.00029, Q=0.0035	β=-0.59 (-0.86--0.32), P=2.1e-05, Q=7.2e-05	β=0.34 (-0.024-0.70), P=0.068, Q=0.16	β=0.097 (-0.18-0.38), P=0.50, Q=0.80	β=0.23 (-0.057-0.51), P=0.12, Q=0.48	β=-0.83 (-1.20--0.47), P=6.3e-06, Q=3.8e-05	β=-0.12 (-0.55-0.31), P=0.58, Q=0.77
Ruminiclostridium 9 sp.	0.76 (0.071-1.5), P=0.031, Q=0.92	β=-0.32 (-0.61--0.038), P=0.026, Q=0.062	β=-0.40 (-0.68--0.12), P=0.0058, Q=0.038	β=0.17 (-0.13-0.47), P=0.27, Q=0.36	β=-0.20 (-0.49-0.08), P=0.16, Q=0.38	β=0.017 (-0.26-0.30), P=0.91, Q=0.91	β=-0.029 (-0.30-0.24), P=0.83, Q=0.92	β=0.19 (-0.071-0.46), P=0.15, Q=0.36	β=-0.60 (-0.87--0.33), P=1.7e-05, Q=7.2e-05	β=-0.023 (-0.38-0.34), P=0.90, Q=0.90	β=0.38 (0.099-0.66), P=0.0079, Q=0.095	β=0.16 (-0.13-0.44), P=0.28, Q=0.50	β=0.06 (-0.30-0.42), P=0.75, Q=0.75	β=-0.37 (-0.80-0.061), P=0.093, Q=0.37
Variovorax sp.	1.1 (0.13-2.1), P=0.026, Q=0.92	β=-0.12 (-0.41-0.16), P=0.40, Q=0.60	β=-0.15 (-0.43-0.14), P=0.31, Q=0.51	β=-0.17 (-0.47-0.13), P=0.26, Q=0.36	β=-0.19 (-0.47-0.094), P=0.19, Q=0.38	β=-0.07 (-0.35-0.21), P=0.63, Q=0.81	β=0.043 (-0.23-0.31), P=0.75, Q=0.92	β=0.0032 (-0.26-0.27), P=0.98, Q=0.98	β=-0.12 (-0.40-0.15), P=0.37, Q=0.55	β=0.072 (-0.29-0.43), P=0.70, Q=0.90	β=0.01 (-0.27-0.29), P=0.94, Q=0.94	β=0.076 (-0.21-0.36), P=0.60, Q=0.60	β=-0.16 (-0.52-0.20), P=0.39, Q=0.53	β=0.18 (-0.25-0.62), P=0.40, Q=0.77
Anaerovoracaceae XIII AD3011 group sp.	-0.73 (-1.4--0.054), P=0.034, Q=0.92	β=-0.37 (-0.66--0.089), P=0.01, Q=0.06	β=-0.26 (-0.54-0.022), P=0.07, Q=0.26	β=-0.36 (-0.65--0.059), P=0.019, Q=0.076	β=-0.48 (-0.76--0.19), P=0.00097, Q=0.0039	β=0.10 (-0.18-0.38), P=0.47, Q=0.81	β=0.01 (-0.26-0.28), P=0.94, Q=0.94	β=-0.10 (-0.37-0.17), P=0.46, Q=0.79	β=0.59 (0.31-0.86), P=2.4e-05, Q=7.2e-05	β=0.46 (0.10-0.83), P=0.012, Q=0.048	β=-0.089 (-0.37-0.19), P=0.53, Q=0.80	β=-0.12 (-0.41-0.16), P=0.40, Q=0.50	β=-0.42 (-0.78--0.06), P=0.022, Q=0.062	β=0.026 (-0.41-0.46), P=0.90, Q=0.90
Abbreviations: aMED = alternate Mediterranean diet score; aMED-Red = alternate Mediterranean diet score with unprocessed red meat; MUFA:SFA = ratio of monounsaturated to saturated fat; sp. = an unnamed species.
The association of each taxa with disease status (outcome variable) was represented as standardized log odds ratios. The 7 genera and the 12 ASVs that were associated with MS risk (P<0.05) were displayed. The association of each dietary measure with taxa (the outcome variable) were represented as standardized beta coefficients. All results were adjusted for read depth, Bristol Stool Scale group, …
