# Supplementary material for: Mediterranean Diet and Associations with the Gut Microbiota and Pediatric-Onset Multiple Sclerosis: a Trivariate Analysis
Source: Research Square preprint supplement (doi:10.21203/rs.3.rs-2540052/v1), 2023-02-20
Supplement: Supplementary file 2 [file e6d2f1203399dc26dd6b7ebe.xlsx]

## Sheet: Genus-level
The Diet-microbiota subcohort: ASV- and genus-level relative abundance differences in the gut microbial communities between MS cases and controls
Taxonomic classification				Median (Q1 – Q3)			Prevalence		Standardized ORadj (95%CI)	P
Phylum	Family	Genus		MS	Control		MS	Controls
Genera higher in MS cases compared to controls
Euryarchaeota	Methanobacteriaceae	Methanobrevibacter		-1.5 (-1.7 – 4.1)	-1.8 (-2.1 – -1.5)		33%	0.031	5.7 (1.2–28)	0.032
Proteobacteria	Burkholderiaceae	Variovorax		-1.5 (-1.8 – -0.39)	-1.8 (-2.0 – -1.3)		26%	0.094	2.7 (1.1–6.8)	0.035
Patescibacteria	TM7 phylum sp.	oral clone FR058		-1.5 (-1.8 – -1.1)	-1.7 (-2.0 – -1.1)		22%	0.13	2.3 (1.0–5.0)	0.038
Actinobacteria	Eggerthellaceae	Eggerthella		1.7 (0.79 – 2.6)	1.0 (-0.33 – 1.8)		0.89	0.75	2.1 (1.1–4.1)	0.032
Firmicutes	Streptococcaceae	Lactococcus		1.7 (0.44 – 2.5)	0.38 (-1.8 – 2.1)		0.81	0.53	2.1 (1.0–4.1)	0.038
Firmicutes	Ruminococcaceae	Anaerofilum		-1.4 (-1.7 – 0.29)	-1.7 (-2.0 – -0.88)		33%	0.19	2.0 (0.95–4.1)	0.067
Firmicutes	Lachnospiraceae	Sellimonas		-0.68 (-1.7 – 1.8)	-0.97 (-1.8 – 0.89)		52%	0.47	1.9 (0.90–4.1)	0.089
Firmicutes	Lachnospiraceae	[Ruminococcus] gnavus group		0.51 (-1.3 – 2.8)	0.093 (-1.8 – 2.5)		0.63	0.53	1.8 (0.93–3.6)	0.078
Firmicutes	Ruminococcaceae	Acetanaerobacterium		-1.2 (-1.8 – 0.26)	-1.6 (-1.9 – -0.84)		37%	0.22	1.7 (0.93–3.3)	0.084
Genera lower in MS cases compared to controls
Firmicutes	Ruminococcaceae	Anaerotruncus		-1.1 (-1.6 – 0.25)	-0.11 (-1.4 – 0.64)		44%	0.56	0.59 (0.31–1.1)	0.1
Firmicutes	Anaerovoracaceae Family XIII	Family XIII AD3011 group		1.8 (-0.0035 – 2.3)	2.0 (1.3 – 2.8)		0.81	0.84	0.56 (0.30–1.1)	0.08
Firmicutes	Ruminococcaceae	Hydrogenoanaerobacterium		-1.6 (-1.9 – -1.4)	-1.7 (-2.0 – -0.88)		7.4%	0.19	0.49 (0.23–1.1)	0.07
Firmicutes	Clostridiales vadinBB60 group	gut metagenome		-1.6 (-1.8 – -1.1)	-0.38 (-1.6 – 1.5)		22%	0.53	0.39 (0.18–0.82)	0.013
Firmicutes	Lachnospiraceae	Anaerosporobacter		-1.7 (-1.9 – -1.5)	-1.6 (-2.0 – -0.064)		3.7%	0.28	0.38 (0.12–1.2)	0.098
Firmicutes	Ruminococcaceae	Ruminococcaceae NK4A214 group		0.44 (-1.6 – 3.5)	3.7 (2.0 – 4.7)		0.56	0.84	0.32 (0.15–0.69)	0.0034
ASV = amplicon sequence variant; Q1 = 1st quartile; Q3 = 3rd quartile a. The confidence level indicates the percent of the amino acids in the sequence that match the taxonomy. Summary statistics and differences of genera and ASVs (see next tab) abundances by disease status (MS cases vs controls) are represented as odds ratios (OR) adjusted for age (in years) at food-screener completion and sex, t…

## Sheet: ASV-level
Taxonomic classification					Median (Q1 – Q3)			Prevalence		Standardized ORadj (95%CI)	P
Phylum	Family	Genus species (if available)	Confidencea		MS	Control		MS	Controls
ASVs higher in MS cases compared to controls
Actinobacteria	Coriobacteriales Incertae Sedis	Uncultured bacterium	1		-0.74 (-0.89 – -0.57)	-0.93 (-1.0 – -0.73)		15%	0	4.5 (0.77–26)	0.094
Firmicutes	Ruminococcaceae	UCG-005 uncultured bacterium adhufec311	0.77		-0.74 (-0.88 – -0.57)	-0.91 (-1.0 – -0.71)		11%	0.031	3.6 (0.94–14)	0.062
Firmicutes	Lachnospiraceae	Lachnoclostridium	0.77		-0.74 (-0.89 – -0.50)	-0.91 (-1.0 – -0.71)		22%	0.031	3.5 (1.2–10)	0.018
Firmicutes	Ruminococcaceae	Unnamed	1		-0.72 (-0.88 – 0.11)	-0.88 (-1.0 – -0.67)		26%	0.063	3.4 (1.3–8.7)	0.012
Proteobacteria	Burkholderiaceae	Variovorax	0.92		-0.70 (-0.88 – 0.38)	-0.86 (-1.0 – -0.60)		26%	0.094	3.0 (1.1–7.8)	0.026
Firmicutes	Family XI	Peptoniphilus uncultured organism	0.81		-0.73 (-0.89 – -0.56)	-0.88 (-1.0 – -0.67)		19%	0.063	2.9 (0.89–9.4)	0.078
Firmicutes	Lachnospiraceae	Sellimos uncultured bacterium	0.98		-0.53 (-0.85 – 2.5)	-0.50 (-0.91 – 1.6)		44%	0.41	2.6 (0.99–6.9)	0.054
Firmicutes	Ruminococcaceae	Ruminiclostridium 5 uncultured bacterium	0.99		-0.57 (-0.85 – 0.86)	-0.70 (-0.93 – 0.15)		37%	0.28	2.4 (1.0–5.8)	0.043
Firmicutes	Lachnospiraceae	Blautia	0.93		-0.85 (-0.92 – -0.56)	-0.91 (-1.0 – -0.71)		15%	0.031	2.4 (1.0–5.7)	0.051
Proteobacteria	Caulobacteraceae	Caulobacter	1		-0.81 (-0.91 – -0.57)	-0.91 (-1.0 – -0.71)		11%	0.031	2.4 (1.0–5.6)	0.049
Actinobacteria	Eggerthellaceae	Eggerthella	1		2.5 (1.4 – 3.6)	2.1 (-0.32 – 2.8)		0.89	0.72	2.3 (1.1–4.8)	0.022
Firmicutes	Lachnospiraceae	Lachnoclostridium	0.76		-0.68 (-0.86 – 1.1)	-0.91 (-1.0 – -0.60)		30%	0.094	2.3 (0.97–5.6)	0.058
Firmicutes	Ruminococcaceae	Negativibacillus uncultured bacterium	0.99		-0.70 (-0.86 – -0.50)	-0.91 (-1.0 – -0.60)		22%	0.094	2.3 (0.86–5.9)	0.099
Bacteroidetes	Bacteroidaceae	Bacteroides	1		-0.81 (-0.92 – -0.56)	-0.88 (-1.0 – -0.67)		15%	0.063	2.2 (0.92–5.4)	0.074
Firmicutes	Streptococcaceae	Lactococcus	1		2.6 (1.2 – 3.4)	1.4 (-0.83 – 2.7)		0.81	0.53	2.2 (1.1–4.4)	0.03
Firmicutes	Streptococcaceae	Streptococcus	1		-0.81 (-0.91 – -0.57)	-0.91 (-1.0 – -0.71)		19%	0.031	2.2 (0.95–4.9)	0.066
Firmicutes	Ruminococcaceae	Ruminiclostridium 9	1		-0.53 (-0.89 – 2.4)	-0.79 (-1.0 – 0.10)		44%	0.25	2.1 (1.1–4.3)	0.031
Firmicutes	Ruminococcaceae	Aerofilum uncultured bacterium	0.85		-0.58 (-0.85 – 1.2)	-0.78 (-0.98 – -0.41)		33%	0.19	2.1 (1.0–4.5)	0.047
Firmicutes	Lachnospiraceae	GCA-900066575 uncultured bacterium	1		-0.68 (-0.85 – 0.82)	-0.88 (-1.0 – -0.60)		30%	0.094	2.0 (0.96–4.2)	0.064
Firmicutes	Lachnospiraceae	Eisenbergiella uncultured organism	1		-0.55 (-0.81 – 2.1)	-0.70 (-0.97 – 0.77)		41%	0.31	2.0 (0.99–4.0)	0.054
Proteobacteria	TM7 phylum sp.	oral clone FR058	1		-0.74 (-0.91 – -0.56)	-0.88 (-1.0 – -0.67)		15%	0.063	1.9 (0.96–3.9)	0.067
Bacteroidetes	Barnesiellaceae	Barnesiella	1		-0.81 (-0.91 – -0.57)	-0.88 (-1.0 – -0.67)		11%	0.063	1.9 (0.92–3.9)	0.085
Firmicutes	Lachnospiraceae	Aerostipes unidentified	0.75		-0.74 (-0.92 – -0.50)	-0.86 (-1.0 – -0.60)		22%	0.094	1.9 (0.89–3.9)	0.099
Firmicutes	Ruminococcaceae	Uncultured human gut metagenome	1		1.7 (-0.54 – 3.1)	-0.34 (-0.80 – 3.0)		67%	0.47	1.8 (0.97–3.5)	0.062
Firmicutes	Ruminococcaceae	Acetaerobacterium uncultured rumen bacterium	1		-0.57 (-0.91 – 1.2)	-0.75 (-0.94 – -0.37)		37%	0.22	1.8 (0.96–3.4)	0.068
Firmicutes	Christensenellaceae	R-7 group	0.95		-0.77 (-0.91 – -0.63)	-0.91 (-1.0 – -0.71)		7.4%	0.031	1.8 (0.93–3.5)	0.082
Firmicutes	Lachnospiraceae	[Ruminococcus] gvus group	1		1.1 (-0.57 – 3.6)	0.67 (-0.91 – 3.4)		0.59	0.53	1.8 (0.91–3.5)	0.092
Firmicutes	Ruminococcaceae	Butyricicoccus	1		0.25 (-0.81 – 1.7)	-0.40 (-0.81 – 0.72)		52%	0.44	1.8 (0.90–3.5)	0.096
Firmicutes	Ruminococcaceae	Uncultured Clostridium phoceensis	0.91		1.6 (-0.50 – 3.2)	1.3 (-0.70 – 2.4)		0.7	0.53	1.8 (0.92–3.4)	0.089
Firmicutes	Erysipelotrichaceae	[Clostridium] innocuum group	1		1.6 (0.57 – 2.3)	0.76 (-0.86 – 1.7)		0.78	0.53	1.7 (0.91–3.4)	0.096
Firmicutes	Erysipelotrichaceae	Holdemania	1		0.69 (-0.70 – 2.0)	-0.58 (-0.98 – 1.1)		56%	0.38	1.7 (0.94–3.1)	0.08
Firmicutes	Ruminococcaceae	Faecalibacterium	1		6.4 (-0.64 – 7.1)	0.56 (-0.93 – 5.4)		0.63	0.5	1.7 (0.91–3.1)	0.096
Bacteroidetes	Bacteroidaceae	Bacteroides	1		5.7 (2.7 – 7.1)	1.2 (-0.93 – 6.1)		0.78	0.5	1.7 (0.92–3.0)	0.092
ASVs lower in MS cases compared to controls
Firmicutes	Lachnospiraceae	[Eubacterium] eligens group	1		-0.70 (-0.87 – 2.4)	2.1 (-0.80 – 5.1)		0.37	0.59	0.59 (0.32–1.1)	0.095
Firmicutes	Ruminococcaceae	Ruminococcus 1 uncultured organism	0.84		3.2 (-0.69 – 4.6)	4.8 (1.8 – 6.1)		0.63	0.81	0.58 (0.32–1.1)	0.078
Firmicutes	Ruminococcaceae	UCG-003 uncultured organism	0.75		-0.53 (-0.83 – 3.7)	3.6 (-0.40 – 4.7)		0.48	0.69	0.56 (0.30–1.1)	0.077
Actinobacteria	Bifidobacteriaceae	Bifidobacterium	1		5.5 (-0.77 – 7.7)	7.5 (3.1 – 8.5)		0.59	0.78	0.56 (0.30–1.1)	0.074
Bacteroidetes	Tannerellaceae	Parabacteroides distasonis	0.78		-0.70 (-0.89 – 1.1)	0.65 (-0.90 – 3.8)		0.26	0.5	0.55 (0.27–1.1)	0.09
Firmicutes	Lachnospiraceae	Roseburia metagenome	0.74		-0.74 (-0.90 – -0.56)	-0.59 (-0.87 – 3.7)		15%	0.41	0.54 (0.27–1.1)	0.092
Firmicutes	Lachnospiraceae	Coprococcus 1	1		3.9 (-0.51 – 4.6)	4.8 (3.5 – 5.2)		0.7	0.84	0.54 (0.27–1.1)	0.077
Firmicutes	Lachnospiraceae	UCG-010 uncultured organism	1		-0.70 (-0.88 – 0.11)	-0.34 (-0.90 – 2.7)		26%	0.47	0.52 (0.26–1.0)	0.054
Firmicutes	Christensenellaceae	R-7 group	0.99		-0.72 (-0.87 – 1.6)	-0.42 (-0.94 – 4.2)		30%	0.41	0.51 (0.26–1.0)	0.059
Actinobacteria	Coriobacteriales Incertae Sedis	Uncultured gut metagenome	0.89		-0.70 (-0.86 – 1.8)	0.3 (-0.77 – 3.7)		0.3	0.5	0.51 (0.25–1.0)	0.064
Firmicutes	Anaerovoracaceae Family XIII	AD3011 group sp.	0.94		1.7 (-0.70 – 2.9)	2.3 (0.67 – 3.4)		0.56	0.75	0.48 (0.25–0.95)	0.034
Firmicutes	Ruminococcaceae	Ruminococcus 1 metagenome	0.97		-0.77 (-0.91 – -0.63)	-0.75 (-0.93 – -0.017)		11%	0.25	0.48 (0.22–1.1)	0.073
Firmicutes	Ruminococcaceae	Uncultured Clostridium sp.	0.91		-0.81 (-0.91 – -0.69)	-0.79 (-0.94 – -0.43)		3.7%	0.19	0.44 (0.17–1.1)	0.083
Bacteroidetes	Bacteroidaceae	Bacteroides	1		-0.81 (-0.92 – -0.63)	-0.75 (-0.95 – 0.096)		7.4%	0.25	0.43 (0.17–1.1)	0.072
Firmicutes	Ruminococcaceae	NK4A214 group gut metagenome	0.96		-0.47 (-0.72 – 4.3)	4.3 (2.3 – 5.2)		0.48	0.78	0.31 (0.15–0.67)	0.0029
Firmicutes	Ruminococcaceae	UCG-005 metagenome	0.98		-0.81 (-0.91 – -0.69)	-0.83 (-1.0 – -0.41)		3.7%	0.19	0.30 (0.082–1.1)	0.068
Bacteroidetes	Rikenellaceae	Alistipes indistinctus YIT 12060	0.99		-0.72 (-0.87 – -0.54)	-0.67 (-0.94 – 1.0)		22%	0.34	0.27 (0.077–0.93)	0.038
Firmicutes	Ruminococcaceae	Unclassified	1		-0.85 (-0.92 – -0.70)	-0.79 (-0.98 – -0.43)		0.0%	0.16	0.27 (0.062–1.2)	0.078
